# Supplementary material for: Reply to ‘Comment on “Zero-thermal-quenching and photoluminescence tuning with the assistance of carriers from defect cluster traps”’
Source: Royal Society of Chemistry journal article supplement (doi:10.1039/c9tc04223g), 2019-12-20
Supplement: c9tc04223g1.pdf [file c9tc04223g1.pdf]

## Supporting Information:

Reply to comment on “Zero-thermal-quenching and photoluminescence tuning with the assistance of carriers from defect cluster traps”

Yali Chen,<sup>a</sup> Binxun Yu,<sup>\*a</sup> Jing Gou <sup>\*a</sup> and Shengzhong Frank Liu <sup>ab</sup>

<sup>a</sup>Key Laboratory of Applied Surface and Colloid Chemistry, Ministry of Education; Shaanxi Key Laboratory for Advanced Energy Devices; Shaanxi Engineering Lab for Advanced Energy Technology; School of Materials Science and Engineering, School of Chemistry and Chemical Engineering, Shaanxi Normal University, Xi'an 710119, China. E-mail: yubx@snnu.edu.cn, goujing@snnu.edu.cn

<sup>b</sup>Dalian National Laboratory for Clean Energy; iChEM, Dalian Institute of Chemical Physics, Chinese Academy of Sciences, Dalian, 116023, China; University of the Chinese Academy of Sciences, Beijing 100039, China.

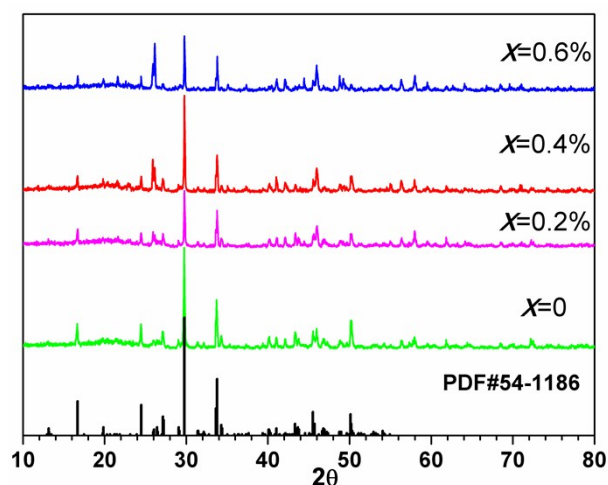

Fig. S1 The XRD patterns of SZ<sub>1-x</sub>SPO:12%Tb<sup>3+</sup> (0 ≤ x ≤ 0.6%).

The XRD patterns of SZ<sub>1-x</sub>SPO:12%Tb<sup>3+</sup> (0 ≤ x ≤ 0.6%) were presented in Fig. S1 in comparison with the Powder Diffraction File (PDF) card No. 54-1186. All the phosphors were certified as pure phase.
